# Supplementary material for: Association between Dietary Patterns and Cardiovascular Risk Factors among Middle-Aged and Elderly Adults in Taiwan: A Population-Based Study from 2003 to 2012
Source: PubMed Central journal article supplement (PMC4930186; doi:10.1371/journal.pone.0157745), 2016-07-01
Supplement: pone.0157745.s001.pdf [file pone.0157745.s001.pdf]

## Supporting Information

**S1 Table. Characteristics of the subjects across quintiles (Q) of Taiwanese dietary pattern.<sup>1</sup>**

|                                         | Taiwanese dietary pattern |              |              |              |              | <i>P</i> for trend |
|-----------------------------------------|---------------------------|--------------|--------------|--------------|--------------|--------------------|
|                                         | Q1                        | Q2           | Q3           | Q4           | Q5           |                    |
| <i>n</i>                                | 22 672                    | 15 557       | 11 797       | 8 125        | 7 814        | -                  |
| Dietary pattern score, range            | -24 to -6                 | -5 to -4     | -3 to -2     | -1 to 0      | 1 to 19      | -                  |
| Sex, % male                             | 55.7                      | 51.4         | 50.1         | 49.7         | 47.0         | < 0.001            |
| Age, y (SD)                             | 50.4 (9.3)                | 51.7 (9.7)   | 52.8 (9.9)   | 53.2 (10.0)  | 54.2 (10.1)  | < 0.001            |
| Education                               |                           |              |              |              |              | < 0.001            |
| < High school, %                        | 23.4                      | 25.9         | 28.9         | 28.5         | 29.1         |                    |
| High school, %                          | 32.2                      | 32.9         | 31.6         | 32.0         | 29.7         |                    |
| > High school, %                        | 44.4                      | 41.2         | 39.5         | 39.5         | 41.1         |                    |
| Marital status                          |                           |              |              |              |              | < 0.001            |
| Never married, %                        | 3.2                       | 2.9          | 2.6          | 2.3          | 2.7          |                    |
| Married, %                              | 86.6                      | 86.4         | 86.1         | 86.5         | 85.2         |                    |
| Widows/divorced, %                      | 10.2                      | 10.7         | 11.3         | 11.2         | 12.1         |                    |
| Smoking, %                              | 26.3                      | 19.5         | 16.3         | 14.8         | 10.0         | < 0.001            |
| Drinking, %                             | 22.9                      | 18.9         | 17.0         | 15.3         | 11.7         | < 0.001            |
| Physical activity, %                    | 57.5                      | 63.1         | 65.8         | 69.0         | 75.6         | < 0.001            |
| Cardiovascular disease, %               | 3.9                       | 4.1          | 4.5          | 4.7          | 5.0          | < 0.001            |
| Body mass index, kg/m <sup>2</sup> (SD) | 23.9 (3.3)                | 23.8 (3.1)   | 23.7 (3.1)   | 23.7 (3.2)   | 23.4 (3.2)   | < 0.001            |
| Waist circumference, cm                 | 80.1 (9.9)                | 79.5 (9.5)   | 79.1 (9.4)   | 79.1 (9.4)   | 78.3 (9.3)   | < 0.001            |
| Systolic blood pressure, mm Hg (SD)     | 122.2 (18.7)              | 122.6 (18.9) | 123.9 (19.5) | 124.0 (19.6) | 124.5 (20.1) | < 0.001            |
| Diastolic blood pressure, mm Hg (SD)    | 73.7 (11.7)               | 73.5 (11.5)  | 74.2 (11.7)  | 73.9 (11.8)  | 73.9 (11.9)  | 0.017              |
| Blood lipids                            |                           |              |              |              |              |                    |
| Triacylglycerol, mmol/L (SD)            | 1.4 (0.7)                 | 1.4 (0.7)    | 1.3 (0.7)    | 1.4 (0.7)    | 1.3 (0.7)    | < 0.001            |
| Total cholesterol, mmol/L (SD)          | 5.2 (0.9)                 | 5.2 (0.9)    | 5.1 (0.9)    | 5.1 (0.9)    | 5.0 (0.9)    | < 0.001            |
| LDL-C, mmol/L (SD)                      | 3.2 (0.8)                 | 3.1 (0.8)    | 3.1 (0.8)    | 3.1 (0.8)    | 2.9 (0.8)    | < 0.001            |
| HDL-C, mmol/L (SD)                      | 1.4 (0.4)                 | 1.4 (0.4)    | 1.5 (0.4)    | 1.4 (0.4)    | 1.5 (0.4)    | < 0.001            |
| C-reactive protein, nmol/L (SD)         | 23.8 (45.3)               | 23.7 (49.2)  | 23.9 (50.5)  | 23.8 (46.0)  | 22.1 (42.8)  | 0.061              |
| Fasting glucose, mmol/L (SD)            | 3.9 (1.2)                 | 3.8 (1.1)    | 3.8 (1.1)    | 3.7 (1.1)    | 3.6 (1.0)    | < 0.001            |

<sup>1</sup>Data are expressed as range, %, or mean (SD). General linear regression was used to test for trend with dietary pattern treated as continuous explanatory variable, while  $\chi^2$  test was employed for categorical variables across all quintile levels of dietary patterns. Q1: the lowest dietary pattern score of Taiwanese dietary pattern; Q5: the highest dietary score of Taiwanese dietary pattern; smoking:  $\geq$  1-3 times/week; drinking:  $\geq$  1-2 times/week; physical activity:  $\geq$  1-2 hours/week.
