# Supplementary material for: Association between Dietary Patterns and Cardiovascular Risk Factors among Middle-Aged and Elderly Adults in Taiwan: A Population-Based Study from 2003 to 2012
Source: PubMed Central journal article supplement (PMC4930186; doi:10.1371/journal.pone.0157745), 2016-07-01
Supplement: pone.0157745.s002.pdf [file pone.0157745.s002.pdf]

## Supporting Information

**S2 Table. Characteristics of the subjects across quintiles (Q) of vegi-fruit dietary pattern.<sup>1</sup>**

|                                         | Vegi-fruit dietary pattern |              |              |              |              | <i>P</i> for trend |
|-----------------------------------------|----------------------------|--------------|--------------|--------------|--------------|--------------------|
|                                         | Q1                         | Q2           | Q3           | Q4           | Q5           |                    |
| <i>n</i>                                | 13 803                     | 13 160       | 13 212       | 13 215       | 9575         | -                  |
| Dietary pattern score, range            | 9 to 14                    | 15 to 16     | 17 to 18     | 19 to 21     | 22 to 42     | -                  |
| Sex, % male                             | 53.8                       | 51.1         | 52.4         | 51.5         | 50.7         | < 0.001            |
| Age, years (SD)                         | 52.0 (9.9)                 | 51.5 (9.6)   | 51.7 (9.7)   | 51.8 (9.8)   | 52.9 (10.1)  | < 0.001            |
| Education                               |                            |              |              |              |              | < 0.001            |
| < High school, %                        | 32.5                       | 27.1         | 24.7         | 23.0         | 23.2         |                    |
| High school, %                          | 34.0                       | 32.8         | 31.5         | 30.9         | 29.5         |                    |
| > High school, %                        | 33.5                       | 40.1         | 43.8         | 46.1         | 47.3         |                    |
| Marital status                          |                            |              |              |              |              | < 0.001            |
| Never married, %                        | 3.4                        | 2.8          | 2.6          | 2.9          | 2.4          |                    |
| Married, %                              | 84.0                       | 86.3         | 87.1         | 87.0         | 87.3         |                    |
| Widows/divorced, %                      | 12.6                       | 10.9         | 10.3         | 10.1         | 10.3         |                    |
| Smoking, %                              | 28.1                       | 20.3         | 18.1         | 15.7         | 13.6         | < 0.001            |
| Drinking, %                             | 21.7                       | 18.8         | 18.1         | 17.3         | 16.5         | < 0.001            |
| Physical activity, %                    | 46.1                       | 59.5         | 67.5         | 72.4         | 79.1         | < 0.001            |
| Cardiovascular disease, %               | 4.1                        | 4.2          | 4.3          | 4.4          | 4.6          | 0.544              |
| Body mass index, kg/m <sup>2</sup> (SD) | 23.9 (3.3)                 | 23.8 (3.2)   | 23.8 (3.2)   | 23.7 (3.1)   | 23.7 (3.1)   | < 0.001            |
| Waist circumference, cm                 | 80.1 (10.0)                | 79.5 (9.6)   | 79.4 (9.5)   | 79.0 (9.4)   | 78.9 (9.4)   | < 0.001            |
| Systolic blood pressure, mm Hg (SD)     | 123.9 (19.7)               | 122.9 (19.4) | 122.7 (18.9) | 122.7 (18.9) | 123.4 (19.4) | 0.002              |
| Diastolic blood pressure, mm Hg (SD)    | 74.2 (12.0)                | 73.9 (11.6)  | 73.8 (11.6)  | 73.5 (11.6)  | 73.8 (11.7)  | < 0.001            |
| Blood lipids                            |                            |              |              |              |              |                    |
| Triacylglycerol, mmol/L (SD)            | 1.4 (0.8)                  | 1.3 (0.7)    | 1.4 (0.7)    | 1.3 (0.7)    | 1.3(0.7)     | < 0.001            |
| Total cholesterol, mmol/L (SD)          | 5.2 (0.9)                  | 5.2 (0.9)    | 5.3 (0.9)    | 5.2 (0.9)    | 5.1(0.9)     | < 0.001            |
| LDL-C, mmol/L (SD)                      | 3.1 (0.8)                  | 3.1 (0.9)    | 3.1 (0.8)    | 3.1 (0.8)    | 3.1(0.8)     | < 0.001            |
| HDL-C, mmol/L (SD)                      | 1.4 (0.4)                  | 1.4 (0.4)    | 1.4 (0.4)    | 1.5 (0.4)    | 1.5 (0.4)    | < 0.001            |
| C-reactive protein, nmol/L (SD)         | 25.9 (50.8)                | 23.0 (44.6)  | 24.1 (54.8)  | 22.5 (41.6)  | 21.8 (38.5)  | < 0.001            |
| Fasting glucose, mmol/L (SD)            | 3.9 (1.2)                  | 3.8 (1.2)    | 3.8 (1.1)    | 3.8 (1.1)    | 3.7 (1.1)    | < 0.001            |

<sup>1</sup>Data are expressed as range, %, or mean (SD). General linear regression was used to test for trend with dietary pattern treated as continuous explanatory variable, while  $\chi^2$  test was employed for categorical variables across all quintile levels of dietary patterns. Q1: the lowest dietary pattern score of vegi-fruit dietary pattern; Q5: the highest dietary score of vegi-fruit dietary pattern; smoking:  $\geq$  1-3 times/week; drinking:  $\geq$  1-2 times/week; physical activity:  $\geq$  1-2 hours/week.
