# Supplementary material for: Association between Dietary Patterns and Cardiovascular Risk Factors among Middle-Aged and Elderly Adults in Taiwan: A Population-Based Study from 2003 to 2012
Source: PubMed Central journal article supplement (PMC4930186; doi:10.1371/journal.pone.0157745), 2016-07-01
Supplement: pone.0157745.s003.pdf [file pone.0157745.s003.pdf]

## Supporting Information

**S3 Table. Characteristics of the subjects across quintiles (Q) of meat-processed dietary pattern.<sup>1</sup>**

|                                         | Meat-processed dietary pattern |              |              |              |              | <i>P</i> for trend |
|-----------------------------------------|--------------------------------|--------------|--------------|--------------|--------------|--------------------|
|                                         | Q1                             | Q2           | Q3           | Q4           | Q5           |                    |
| <i>n</i>                                | 13 423                         | 11 631       | 16 747       | 11 656       | 9508         | -                  |
| Dietary pattern score, range            | 11 to 17                       | 18 to 19     | 20 to 22     | 23 to 25     | 26 to 56     | -                  |
| Sex, % male                             | 39.9                           | 46.7         | 52.4         | 59.7         | 65.4         | < 0.001            |
| Age, years (SD)                         | 55.2 (10.3)                    | 52.9 (9.9)   | 51.4 (9.5)   | 50.3 (9.1)   | 49.1 (8.8)   | < 0.001            |
| Education                               |                                |              |              |              |              | < 0.001            |
| < High school, %                        | 39.4                           | 28.2         | 23.6         | 20.1         | 17.8         |                    |
| High school, %                          | 31.1                           | 32.2         | 32.7         | 32.0         | 31.1         |                    |
| > High school, %                        | 29.5                           | 39.6         | 43.7         | 47.8         | 51.1         |                    |
| Marital status                          |                                |              |              |              |              | < 0.001            |
| Never married, %                        | 2.4                            | 2.8          | 3.1          | 3.0          | 2.8          |                    |
| Married, %                              | 81.8                           | 85.7         | 87.1         | 88.7         | 88.9         |                    |
| Widows/divorced, %                      | 15.8                           | 11.5         | 9.8          | 8.3          | 8.3          |                    |
| Smoking, %                              | 11.9                           | 15.1         | 19.2         | 23.5         | 31.5         | < 0.001            |
| Drinking, %                             | 11.9                           | 15.3         | 18.9         | 22.6         | 26.9         | < 0.001            |
| Physical activity, %                    | 62.8                           | 65.5         | 64.6         | 64.6         | 61.6         | < 0.001            |
| Cardiovascular disease, %               | 5.4                            | 4.5          | 4.1          | 3.7          | 3.5          | < 0.001            |
| Body mass index, kg/m <sup>2</sup> (SD) | 23.6 (3.2)                     | 23.6 (3.1)   | 23.8 (3.2)   | 23.9 (3.2)   | 24.2 (3.3)   | < 0.001            |
| Waist circumference, cm                 | 78.2 (9.4)                     | 78.6 (9.5)   | 79.3 (9.5)   | 80.2 (9.6)   | 81.5 (9.9)   | < 0.001            |
| Systolic blood pressure, mm Hg (SD)     | 125.7 (20.7)                   | 123.4 (19.3) | 122.5 (19.0) | 121.9 (18.4) | 121.8 (17.9) | < 0.001            |
| Diastolic blood pressure, mm Hg (SD)    | 70.9 (19.0)                    | 70.5 (18.8)  | 70.5 (18.9)  | 70.7 (18.6)  | 71.2 (18.3)  | < 0.001            |
| Blood lipids                            |                                |              |              |              |              |                    |
| Triacylglycerol, mmol/L (SD)            | 1.3 (0.7)                      | 1.3 (0.7)    | 1.3 (0.7)    | 1.4 (0.8)    | 1.4 (0.8)    | < 0.001            |
| Total cholesterol, mmol/L (SD)          | 5.2 (0.9)                      | 5.2 (0.9)    | 5.1 (0.9)    | 5.2 (0.9)    | 5.2 (0.9)    | < 0.001            |
| LDL-C, mmol/L (SD)                      | 3.1 (0.8)                      | 3.1 (0.8)    | 3.0 (0.8)    | 3.1 (0.8)    | 3.2 (0.8)    | < 0.001            |
| HDL-C, mmol/L (SD)                      | 1.5 (0.4)                      | 1.5 (0.4)    | 1.5 (0.4)    | 1.4 (0.4)    | 1.4 (0.4)    | < 0.001            |
| C-reactive protein, nmol/L (SD)         | 24.7 (54.7)                    | 23.4 (47.1)  | 23.6 (48.8)  | 22.6 (38.7)  | 23.4 (40.1)  | 0.006              |
| Fasting glucose, mmol/L (SD)            | 3.7 (1.1)                      | 3.7 (1.1)    | 3.8 (1.1)    | 3.9 (1.2)    | 4.0 (1.2)    | < 0.001            |

<sup>1</sup>Data are expressed as range, %, or mean (SD). General linear regression was used to test for trend with dietary pattern treated as continuous explanatory variable, while  $\chi^2$  test was employed for categorical variables across all quintile levels of dietary patterns. Q1: the lowest dietary pattern score of meat-processed dietary pattern; Q5: the highest dietary score of meat-processed dietary pattern; smoking:  $\geq$  1-3 times/week; drinking:  $\geq$  1-2 times/week; physical activity:  $\geq$  1-2 hours/week.
