# Supplementary material for: Association between Dietary Patterns and Cardiovascular Risk Factors among Middle-Aged and Elderly Adults in Taiwan: A Population-Based Study from 2003 to 2012
Source: PubMed Central journal article supplement (PMC4930186; doi:10.1371/journal.pone.0157745), 2016-07-01
Supplement: pone.0157745.s004.pdf [file pone.0157745.s004.pdf]

## Supporting Information

**S4 Table. Pearson's correlation coefficients (*r*) of cardiovascular disease risk factors.**

|                           | <b>Triacylglycerol</b> | <b>Total cholesterol</b> | <b>LDL-C</b>       | <b>HDL-C</b>       | <b>C-reactive protein</b> | <b>Fasting glucose</b> |
|---------------------------|------------------------|--------------------------|--------------------|--------------------|---------------------------|------------------------|
| <b>Triacylglycerol</b>    | 1.00                   |                          |                    |                    |                           |                        |
| <b>Total cholesterol</b>  | 0.26 <sup>1</sup>      | 1.00                     |                    |                    |                           |                        |
| <b>LDL-C</b>              | 0.11 <sup>1</sup>      | 0.91 <sup>1</sup>        | 1.00               |                    |                           |                        |
| <b>HDL-C</b>              | -0.47 <sup>1</sup>     | 0.20 <sup>1</sup>        | -0.08 <sup>1</sup> | 1.00               |                           |                        |
| <b>C-reactive protein</b> | 0.03 <sup>1</sup>      | -0.0001                  | 0.02 <sup>1</sup>  | -0.07 <sup>1</sup> | 1.00                      |                        |
| <b>Fasting glucose</b>    | 0.62 <sup>1</sup>      | 0.39 <sup>1</sup>        | 0.56 <sup>1</sup>  | -0.76 <sup>1</sup> | 0.07 <sup>1</sup>         | 1.00                   |

<sup>1</sup> $p < 0.001$ .
