# Supplementary material for: Association between Dietary Patterns and Cardiovascular Risk Factors among Middle-Aged and Elderly Adults in Taiwan: A Population-Based Study from 2003 to 2012
Source: PubMed Central journal article supplement (PMC4930186; doi:10.1371/journal.pone.0157745), 2016-07-01
Supplement: pone.0157745.s005.pdf [file pone.0157745.s005.pdf]

## Supporting Information

**S5 Table. Pearson's correlation coefficients (*r*) between dietary scores, demographic data, lifestyle, or health characteristics and cardiovascular disease risk factors.**

|                               | Pearson's correlation coefficient ( <i>r</i> ), <i>n</i> = 62,965 |                    |                    |                    |                    |                    |
|-------------------------------|-------------------------------------------------------------------|--------------------|--------------------|--------------------|--------------------|--------------------|
|                               | Triacylglycerol                                                   | Total cholesterol  | LDL-C              | HDL-C              | C-reactive protein | Fasting glucose    |
| Taiwanese dietary scores      | -0.03 <sup>3</sup>                                                | -0.07 <sup>3</sup> | -0.08 <sup>3</sup> | 0.02 <sup>3</sup>  | -0.01 <sup>3</sup> | -0.02 <sup>3</sup> |
| Vegi-fruit dietary scores     | -0.04 <sup>3</sup>                                                | -0.04 <sup>3</sup> | -0.04 <sup>3</sup> | -0.03 <sup>3</sup> | -0.03 <sup>3</sup> | -0.02 <sup>3</sup> |
| Meat-processed dietary scores | 0.05 <sup>3</sup>                                                 | 0.02 <sup>3</sup>  | 0.04 <sup>3</sup>  | -0.08 <sup>3</sup> | -0.001             | 0.04 <sup>3</sup>  |
| Sex                           | 0.21 <sup>3</sup>                                                 | -0.01 <sup>3</sup> | 0.09 <sup>3</sup>  | -0.39 <sup>3</sup> | 0.02 <sup>3</sup>  | 0.35 <sup>3</sup>  |
| Age                           | 0.07 <sup>3</sup>                                                 | 0.11 <sup>3</sup>  | 0.10 <sup>3</sup>  | -0.006             | 0.08 <sup>3</sup>  | 0.05 <sup>3</sup>  |
| Education                     | -0.03 <sup>3</sup>                                                | -0.06 <sup>3</sup> | -0.03 <sup>3</sup> | -0.06 <sup>3</sup> | 0.05 <sup>3</sup>  | 0.03 <sup>3</sup>  |
| Marital status                | 0.02 <sup>3</sup>                                                 | 0.04 <sup>3</sup>  | -0.02 <sup>3</sup> | 0.04 <sup>3</sup>  | 0.02 <sup>3</sup>  | -0.02 <sup>3</sup> |
| Smoking                       | 0.15 <sup>3</sup>                                                 | -0.01 <sup>1</sup> | 0.03 <sup>3</sup>  | -0.20 <sup>3</sup> | 0.02 <sup>3</sup>  | 0.20 <sup>3</sup>  |
| Drinking                      | 0.11 <sup>3</sup>                                                 | 0.01               | -0.01 <sup>2</sup> | -0.05 <sup>3</sup> | 0.001              | 0.05 <sup>3</sup>  |
| Physical activity             | -0.03 <sup>3</sup>                                                | 0.01 <sup>2</sup>  | 0.01 <sup>3</sup>  | 0.02 <sup>3</sup>  | -0.02 <sup>3</sup> | -0.02 <sup>3</sup> |
| Cardiovascular disease        | 0.03 <sup>3</sup>                                                 | 0.003              | 0.003              | -0.02 <sup>3</sup> | 0.03 <sup>3</sup>  | 0.02 <sup>3</sup>  |
| Body mass index               | 0.33 <sup>3</sup>                                                 | 0.11 <sup>3</sup>  | 0.16 <sup>3</sup>  | -0.35 <sup>3</sup> | 0.08 <sup>3</sup>  | 0.37 <sup>3</sup>  |
| Waist circumference           | 0.39 <sup>3</sup>                                                 | 0.10 <sup>3</sup>  | 0.18 <sup>3</sup>  | -0.46 <sup>3</sup> | 0.09 <sup>3</sup>  | 0.46 <sup>3</sup>  |
| Systolic blood pressure       | 0.11 <sup>3</sup>                                                 | 0.06 <sup>3</sup>  | 0.05 <sup>3</sup>  | -0.06 <sup>3</sup> | 0.03 <sup>3</sup>  | 0.09 <sup>3</sup>  |
| Diastolic blood pressure      | 0.14 <sup>3</sup>                                                 | 0.05 <sup>3</sup>  | 0.05 <sup>3</sup>  | -0.10 <sup>3</sup> | 0.02 <sup>3</sup>  | 0.12 <sup>3</sup>  |

<sup>1</sup>*p* < 0.05.

<sup>2</sup>*p* < 0.01.

<sup>3</sup>*p* < 0.001.
